# Supplementary material for: Analysis of the role of retrotransposition in gene evolution in vertebrates
Source: PubMed Central journal article supplement (PMC2048973; doi:10.1186/1471-2105-8-308), 2007-08-24
Supplement: 1471-2105-8-308-S1.pdf [file 1471-2105-8-308-S1.pdf]

(A)

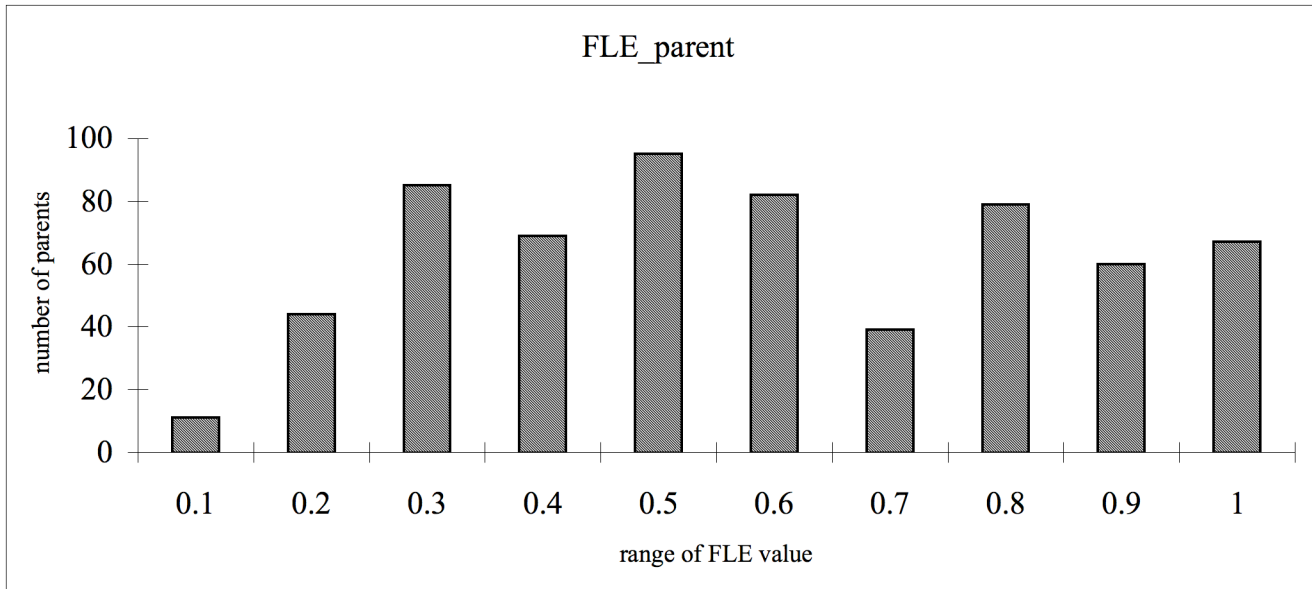

(B)

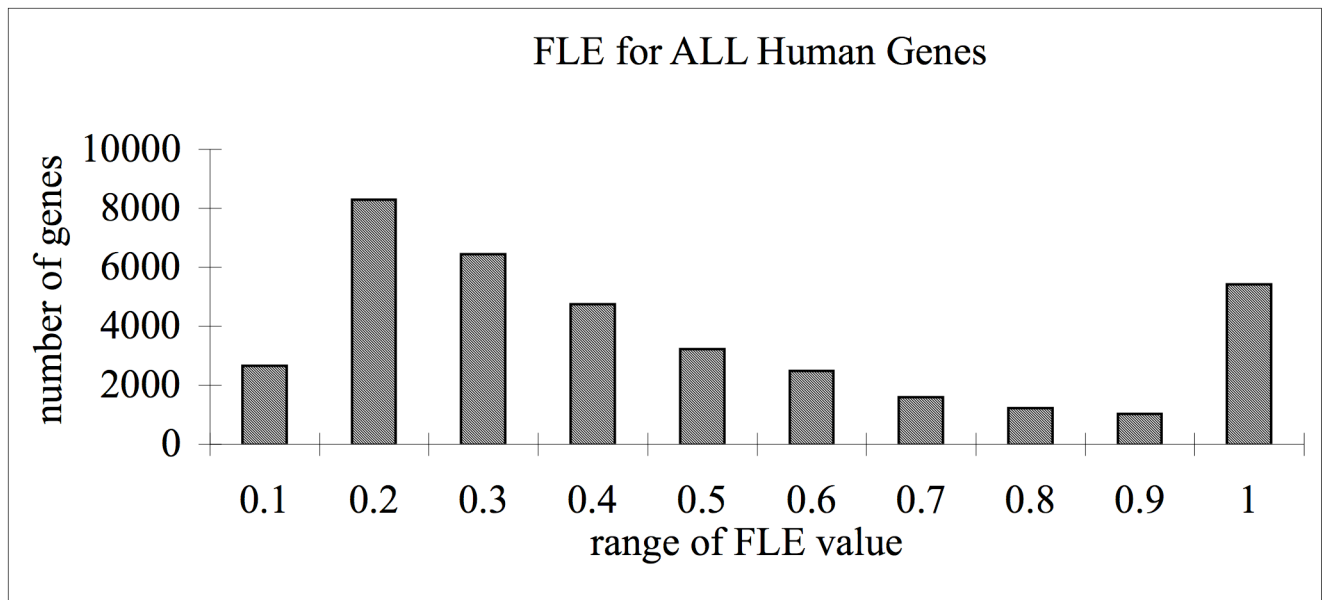

(C)

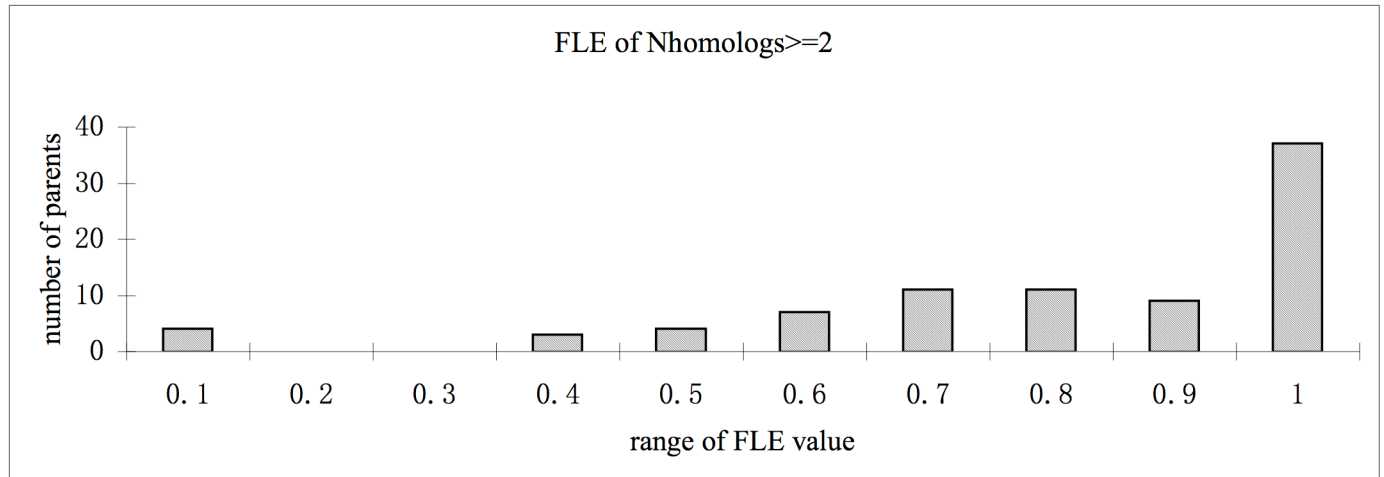

(D)

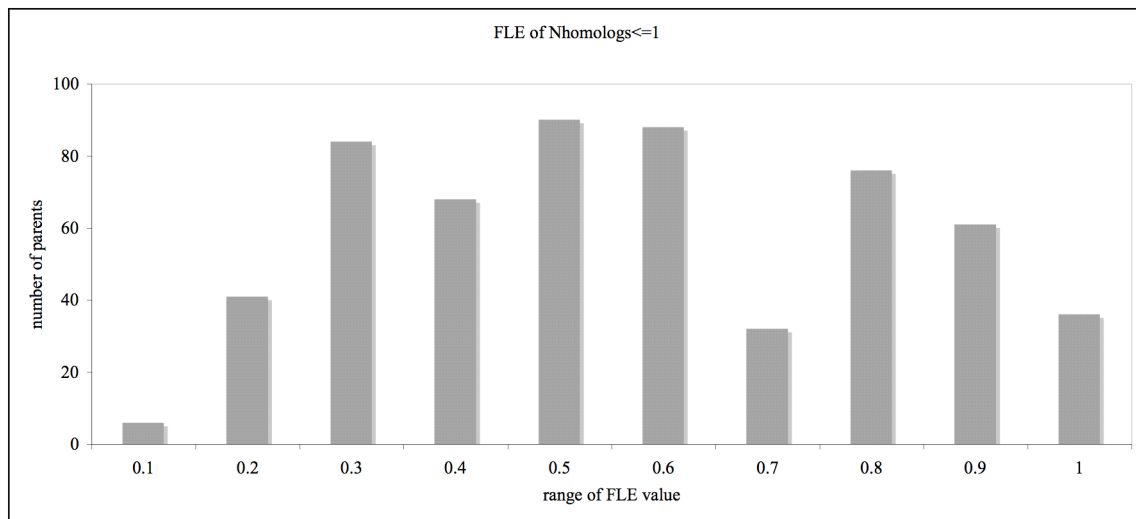

**Supplementary Figure 1: Distributions of the fraction of the largest exon (FLE).** FLE is the ‘fraction of the largest exon’, covered within the coding sequence of the proteins. We derived histograms for this measure for various sets of sequences. Histogram bins labelled  $x$  contain all values such that  $x-0.1 <$

FLE  $\leq x$ . **(A)** We calculated FLE<sub>parent</sub> for all parent genes for human PRs. FLE<sub>parent</sub> has an approximately uniform distribution for this data set. **(B)** The overall distribution for human genes shows a peak in FLE between 0.2-0.3; the peak at 0.9-1.0 is due to single-exon genes. **(C)** The distribution of FLE<sub>parent</sub> for all human PRs with  $N_{\text{homologs}} \geq 2$ , according to the local gene order test (see *Methods* for details). Note that the putative parents for these PRs tend to have a single large exon; more than two-thirds of these apparent PRs arise from genomic clusters of Zn-finger containing proteins. **(D)** As for (C), but with  $N_{\text{homologs}} \leq 1$ .
