# Supplementary material for: Analysis of the role of retrotransposition in gene evolution in vertebrates
Source: PubMed Central journal article supplement (PMC2048973; doi:10.1186/1471-2105-8-308), 2007-08-24
Supplement: 1471-2105-8-308-S3.pdf [file 1471-2105-8-308-S3.pdf]

database [ <http://www.ncbi.nlm.nih.gov/BLAST/> ]. One hundred bootstrap replicates were generated using the PHYLIP *bootseq*, *proml* and *consense* programs [ref.].
