# Supplementary material for: Analysis of the role of retrotransposition in gene evolution in vertebrates
Source: PubMed Central journal article supplement (PMC2048973; doi:10.1186/1471-2105-8-308), 2007-08-24
Supplement: 1471-2105-8-308-S4.pdf [file 1471-2105-8-308-S4.pdf]

## Supplementary Figure 4

(a) Citrate synthase from Mouse (ENSMUSP00000052373, as in Suppl. Fig. 3)

**PR** (ENSMUSP00000052373)

[  $P_{RFC} \leq 0.01$  ;  $Ka/Ks$  (PR-parent) = 0.21;  $Ka$  = 0.04;  $Ks$  = 0.19; no match to full-length cDNA ]

### Chromosome 10

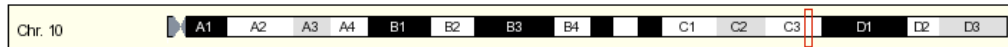

### Overview

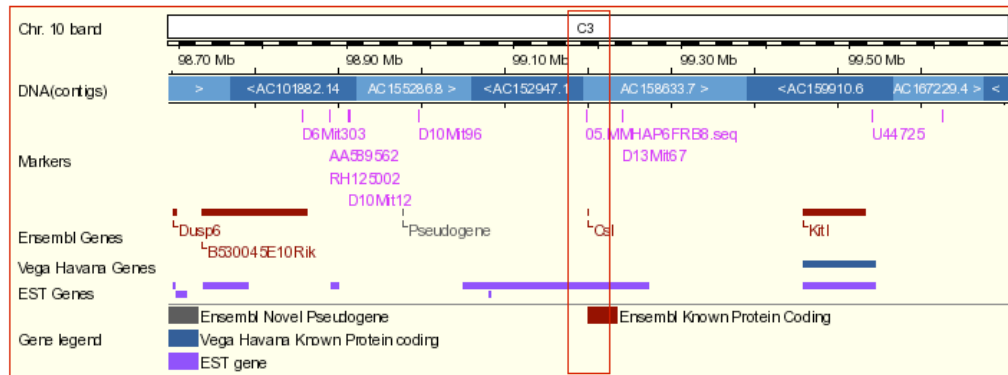

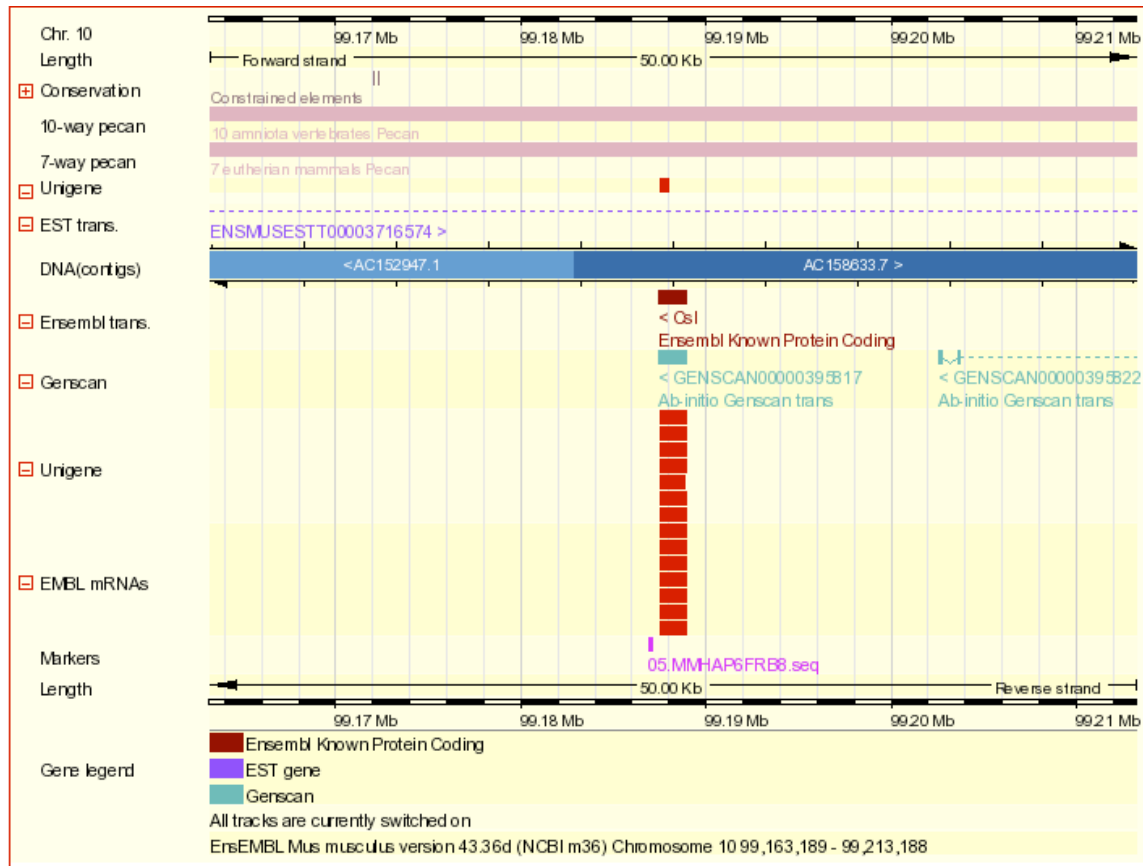

## Parent (ENSMUSP0000005826)

### Chromosome 10

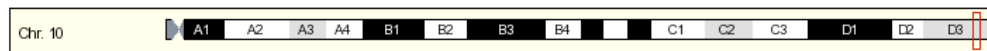

**Overview**

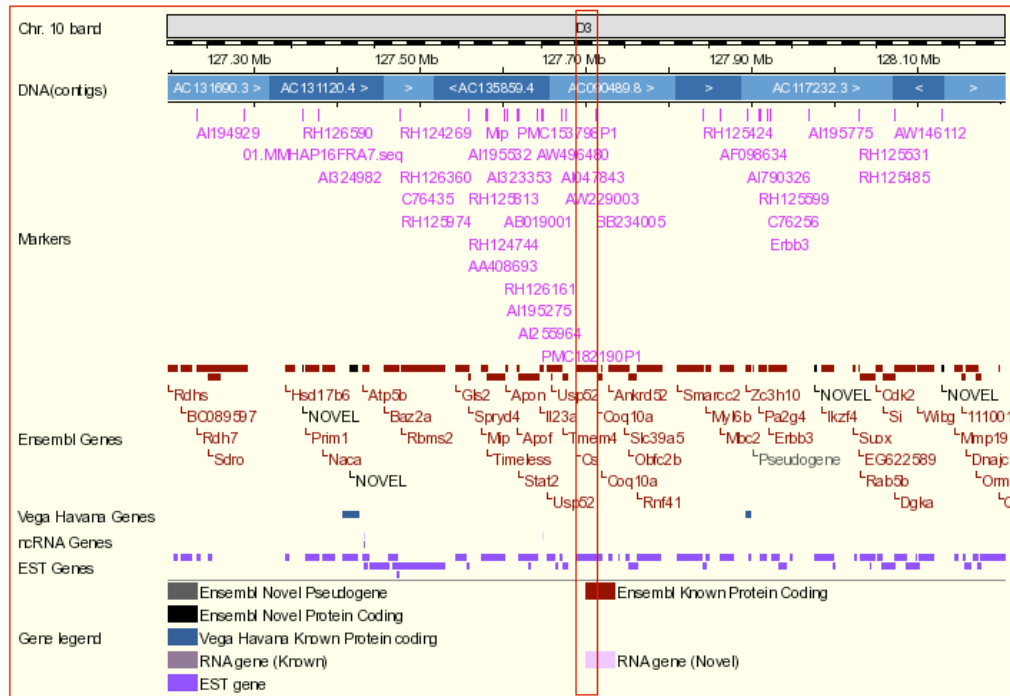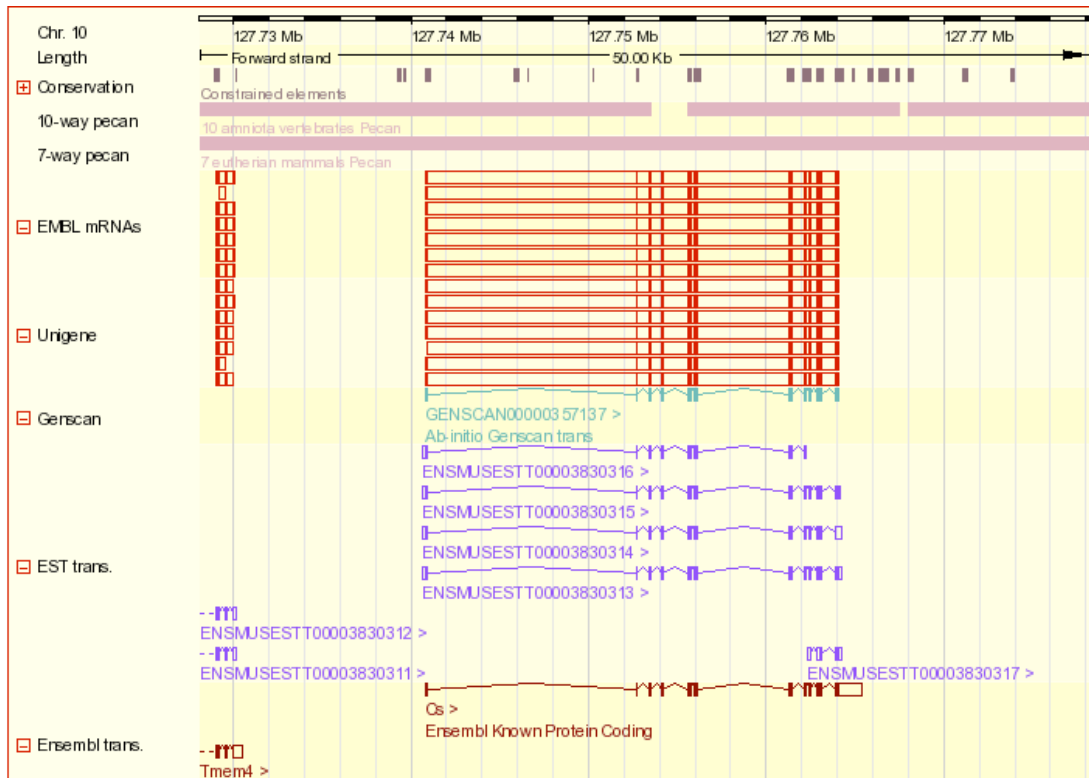

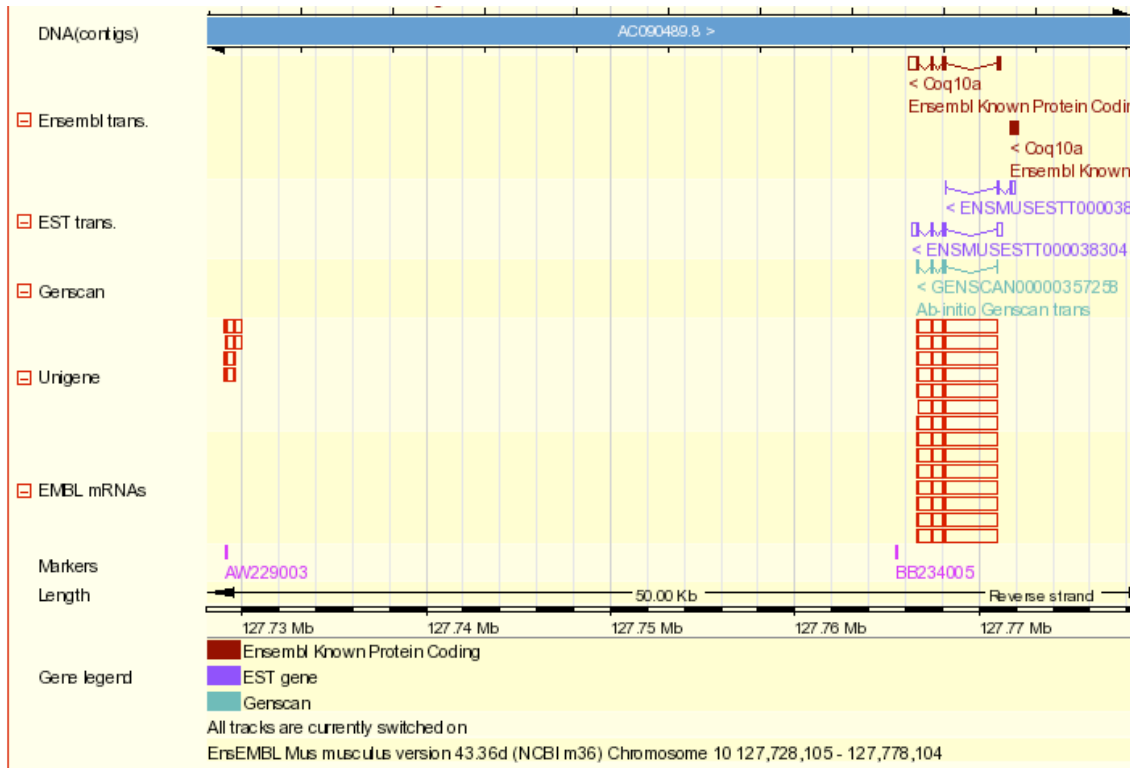

(b) *Ribosomal protein L24-like homolog* ENSP00000269477  
(Human)

**PR** (ENSP00000269477)

[  $P_{RFC} > 0.01$  ;  $Ka/Ks$  (PR-parent) = 0.75;  $Ka$  = 0.07;  $Ks$  = 0.10; no match to full-length cDNA ]

## Chromosome 18

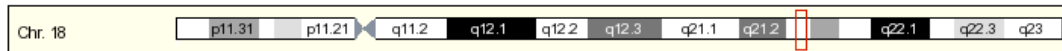

## Overview

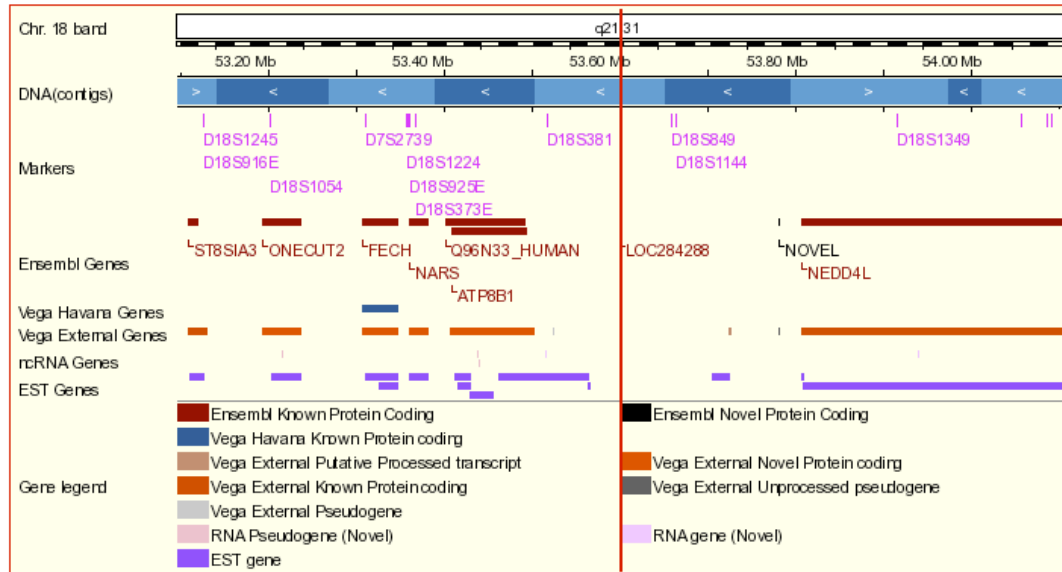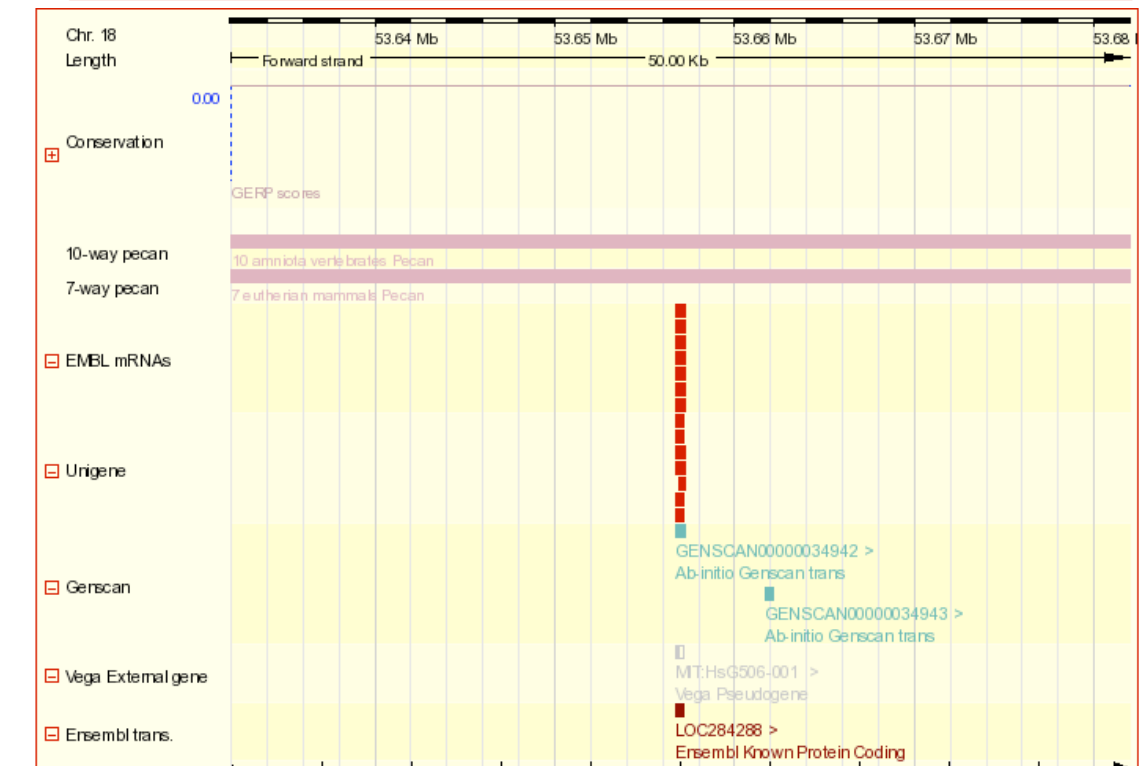

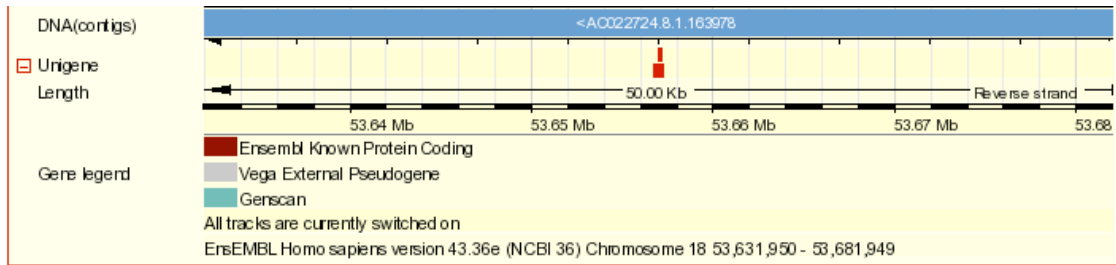

## Parent (ENSP00000260443)

### Chromosome 15

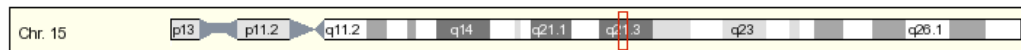

### Overview

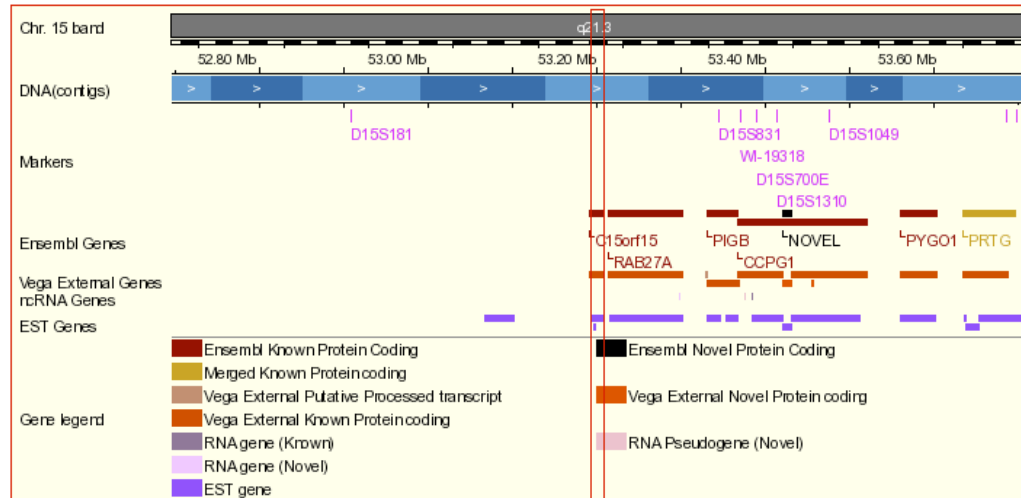

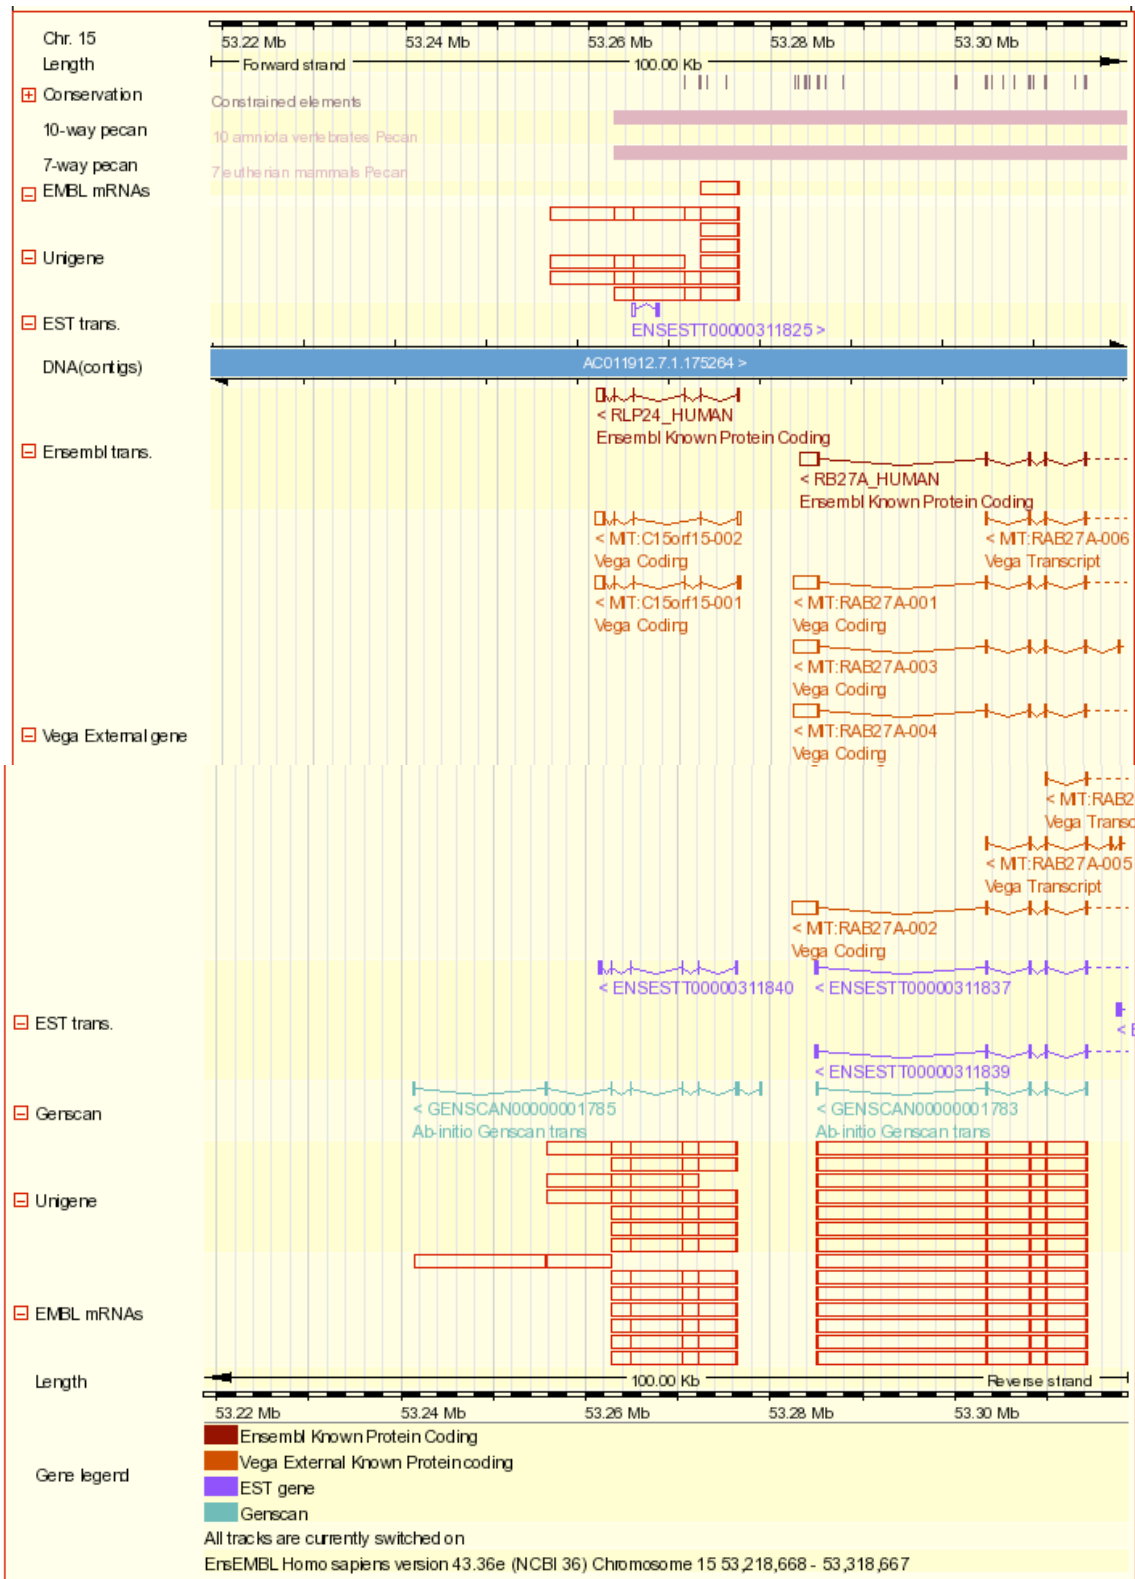

(c) protein similar to chloride intracellular channel 1 ( ENSP00000309706)  
(Human)

**PR (ENSP00000309706)**

[  $P_{RFC} \leq 0.01$  ; Ka/Ks (PR-parent) = 0.44; Ka = 0.07; Ks = 0.16; no match to full-length cDNA ]

**Chromosome 12**

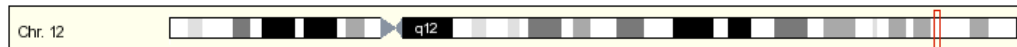

**Overview**

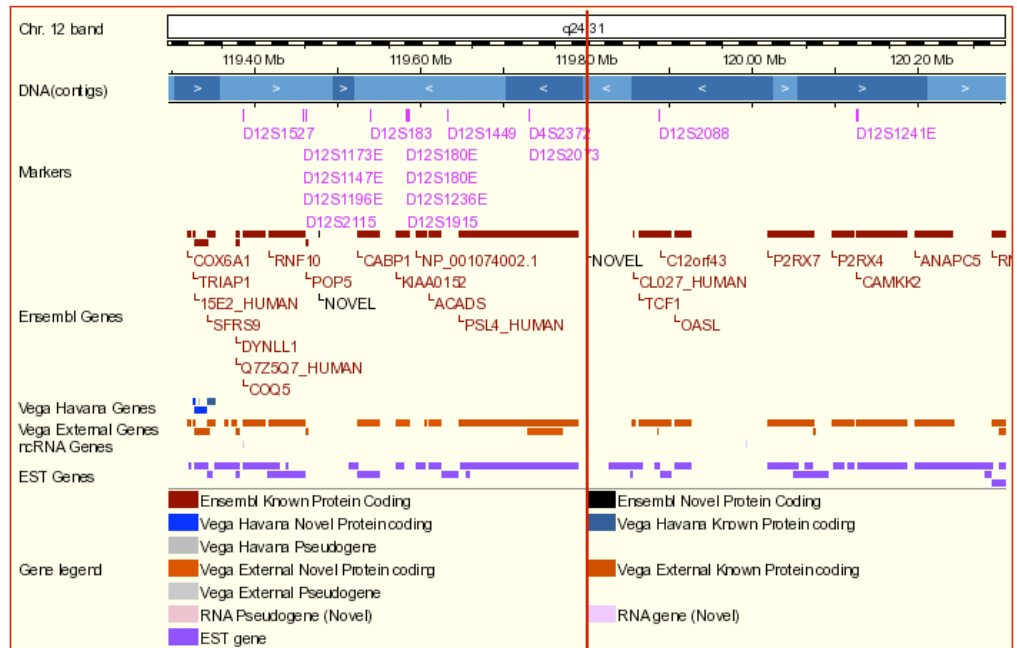



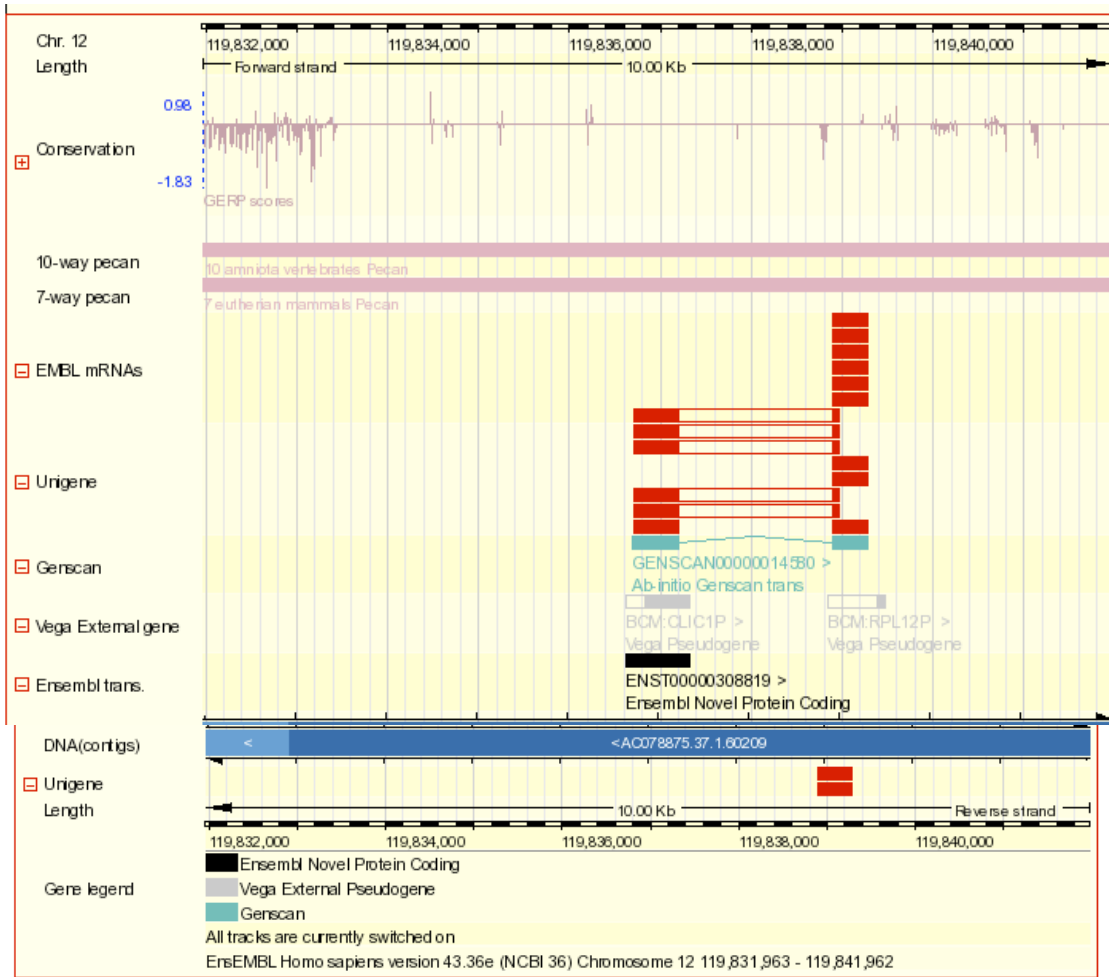

## Parent

### Chromosome c6\_COX

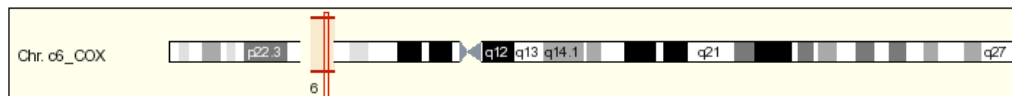

## Overview

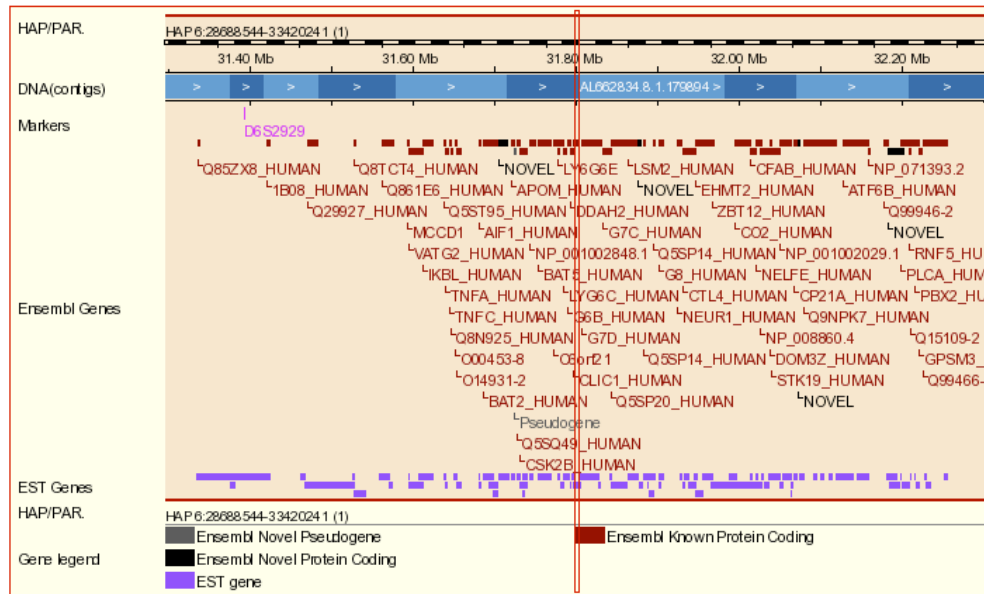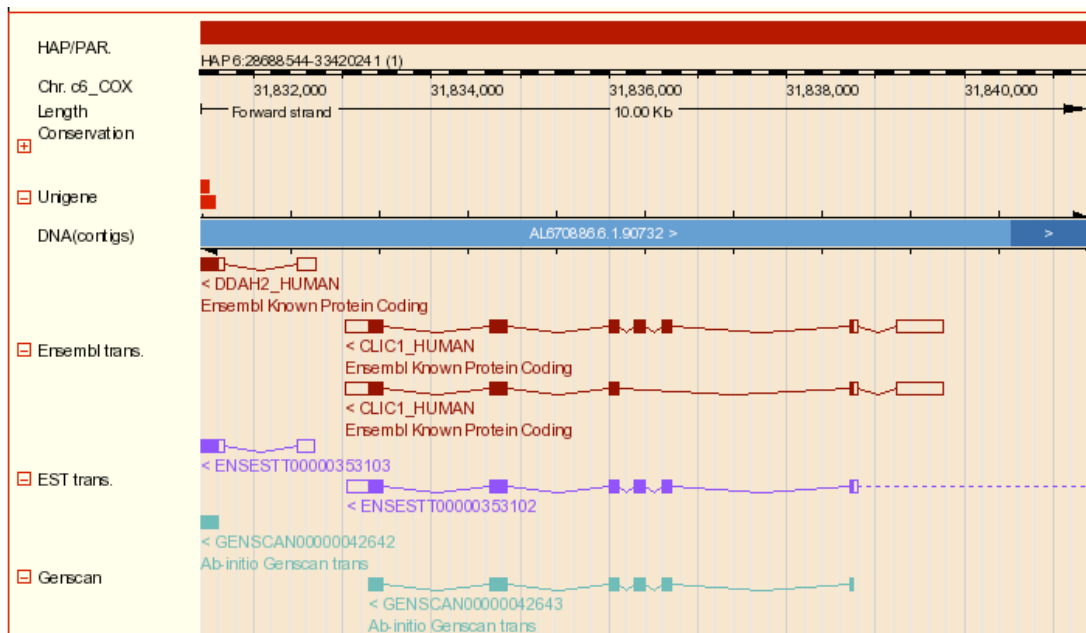

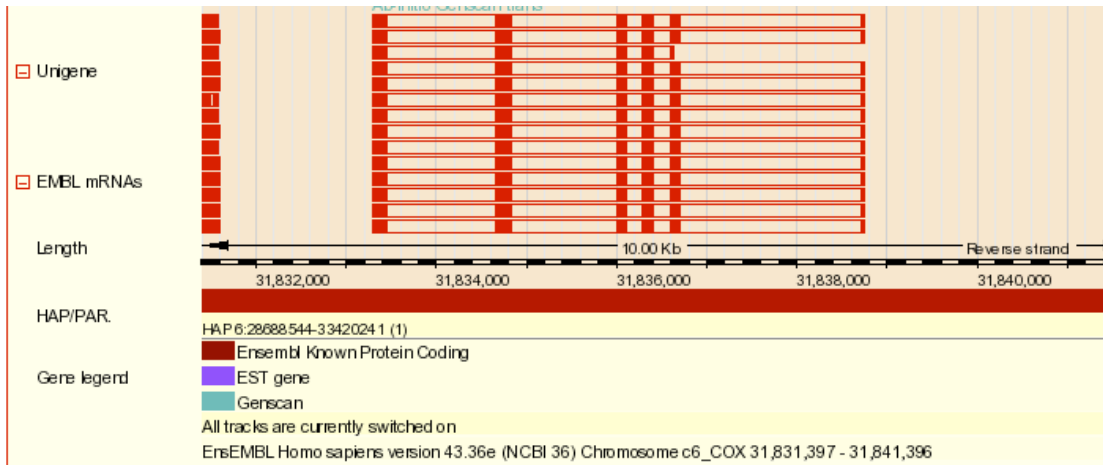

**Supplementary Figure 4:** Screenshots of three examples of PRs, along with their putative parents. (a) Mouse citrate synthase homolog (ENSMUSP00000052373); (b) Ribosomal protein L24-like homolog ENSP00000269477 (Human); (c) Homolog of chloride intracellular channel 1 (ENSP00000309706) (Human). These images were downloaded from <http://www.ensembl.org> in April 2007. For each PR, the following are given: the probability of reading-frame conservation ( $P_{RFC}$ ); the PR-parent Ka/Ks value; the Ka and Ks values and an indication of whether there is a full-length cDNA match.
