# Supplementary material for: Analysis of the role of retrotransposition in gene evolution in vertebrates
Source: Springer Nature journal article supplement (doi:10.1186/1471-2105-8-308), 2007-08-24

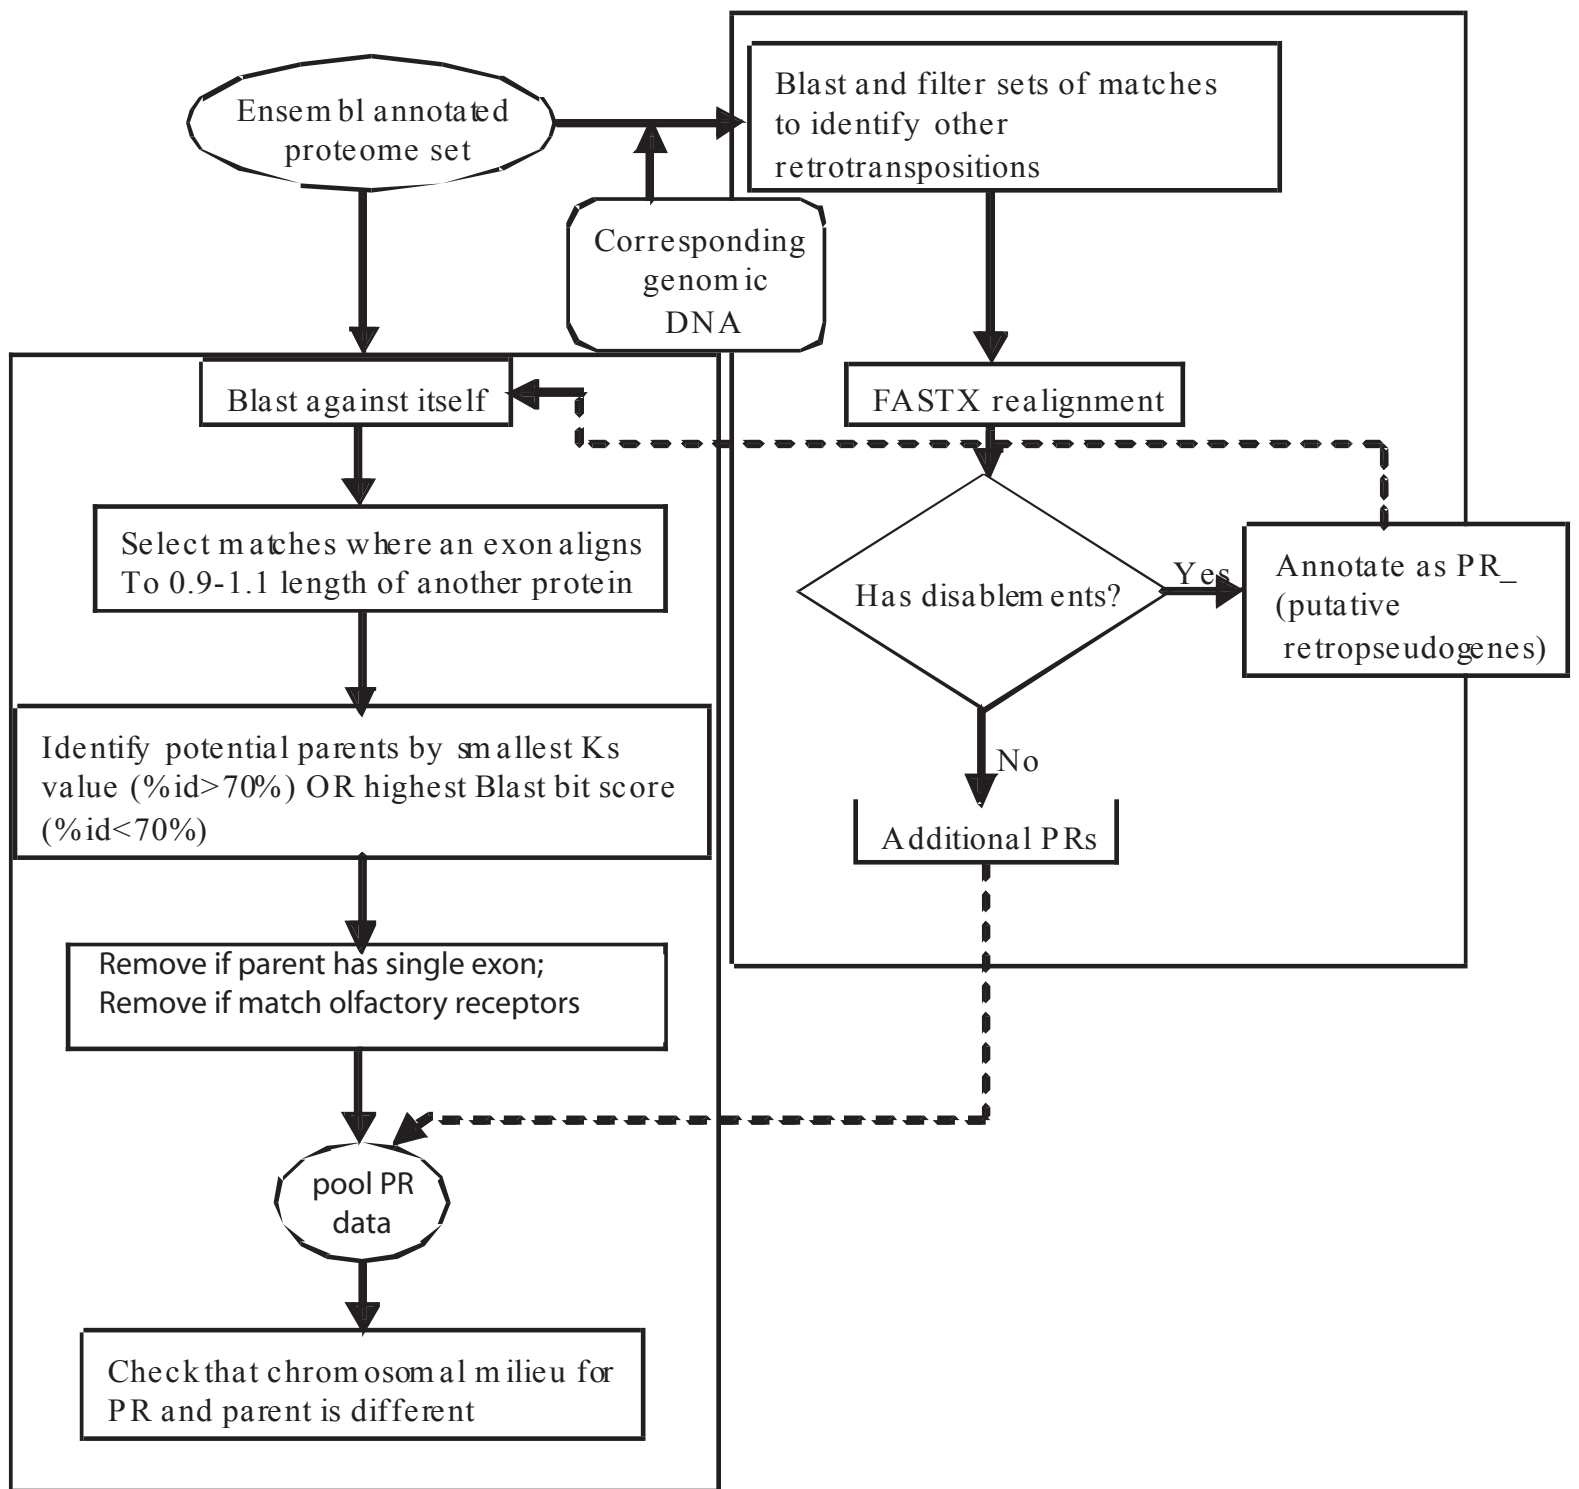

**Checking chromosomal milieu**

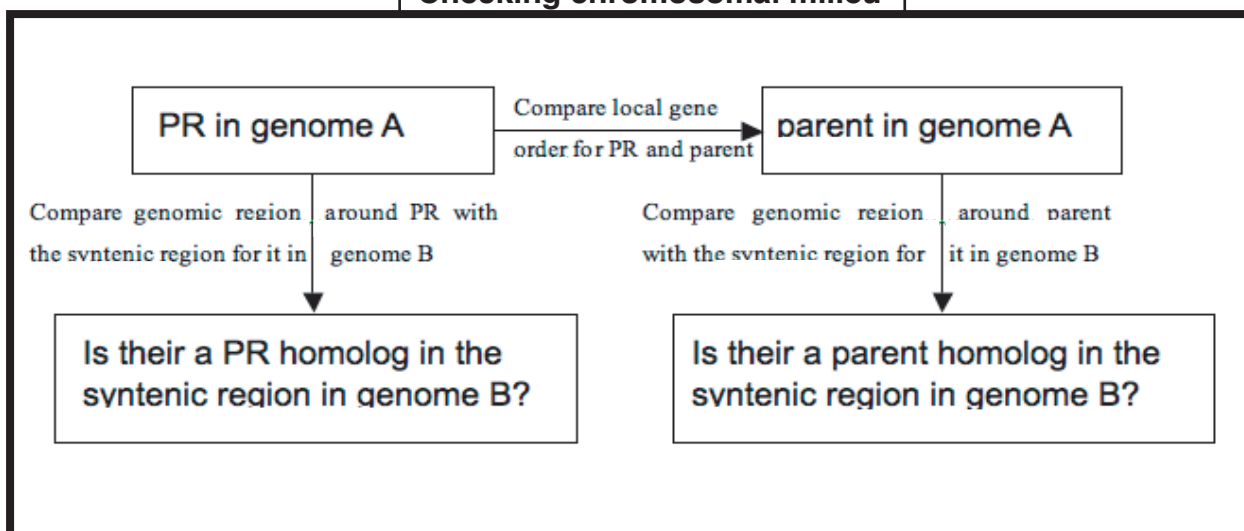

Supplement: 12859_2007_1680_MOESM6_ESM.pdf [file 12859_2007_1680_MOESM6_ESM.pdf]
